# Supplementary material for: An Online-Based Transition Care Program for Adolescents with Spina Bifida Using Intervention Mapping: A Protocol for Program Development
Source: MDPI journal article supplement (doi:10.3390/ijerph19031056), 2022-01-18
Supplement: s1 [file s1]

**This is what you need to prepare to become an adult. Please “V” check in the place that best describes your current status.**

| Transition items                                                                                                                                       | Yes                      | No                       | N/A                      |
|--------------------------------------------------------------------------------------------------------------------------------------------------------|--------------------------|--------------------------|--------------------------|
| <b>1. Healthcare-SB</b>                                                                                                                                |                          |                          |                          |
| 1) I know that preparation (transition) is necessary to become a healthy adult.                                                                        | <input type="checkbox"/> | <input type="checkbox"/> | <input type="checkbox"/> |
| 2) I know my diagnosis.                                                                                                                                | <input type="checkbox"/> | <input type="checkbox"/> | <input type="checkbox"/> |
| 3) I can explain the physical symptoms caused by spina bifida.                                                                                         | <input type="checkbox"/> | <input type="checkbox"/> | <input type="checkbox"/> |
| 4) I know what to do in case of health-related problems (eg allergic reactions, etc.).                                                                 | <input type="checkbox"/> | <input type="checkbox"/> | <input type="checkbox"/> |
| <b>2. Healthcare-voiding management</b>                                                                                                                |                          |                          |                          |
| 5) I purchase and manage catheters (pads) without assistance.                                                                                          | <input type="checkbox"/> | <input type="checkbox"/> | <input type="checkbox"/> |
| 6) I use a catheter (pad) without helps.                                                                                                               | <input type="checkbox"/> | <input type="checkbox"/> | <input type="checkbox"/> |
| 7) I know the importance of water intake and the amount of urination.                                                                                  | <input type="checkbox"/> | <input type="checkbox"/> | <input type="checkbox"/> |
| 8) I know the abnormal symptoms of the urinary system (hematuria, fever, pelvic pain, etc.).                                                           | <input type="checkbox"/> | <input type="checkbox"/> | <input type="checkbox"/> |
| <b>3. Healthcare-bowel management</b>                                                                                                                  |                          |                          |                          |
| 9) I know the pattern and frequency of my defecation.                                                                                                  | <input type="checkbox"/> | <input type="checkbox"/> | <input type="checkbox"/> |
| 10) I cope with fecal incontinence without help.                                                                                                       | <input type="checkbox"/> | <input type="checkbox"/> | <input type="checkbox"/> |
| 11) I do enema without help.                                                                                                                           | <input type="checkbox"/> | <input type="checkbox"/> | <input type="checkbox"/> |
| 12) I know the abnormal symptoms of the bowel problem (blood stool, diarrhea, constipation, etc.).                                                     | <input type="checkbox"/> | <input type="checkbox"/> | <input type="checkbox"/> |
| <b>4. Healthcare-medication</b>                                                                                                                        |                          |                          |                          |
| 13) I buy prescription drugs from a pharmacy without assistance.                                                                                       | <input type="checkbox"/> | <input type="checkbox"/> | <input type="checkbox"/> |
| 14) I Know the name, effect, dosage, and precautions of the drugs I take.                                                                              | <input type="checkbox"/> | <input type="checkbox"/> | <input type="checkbox"/> |
| 15) I Take the medicine accurately without help.                                                                                                       | <input type="checkbox"/> | <input type="checkbox"/> | <input type="checkbox"/> |
| <b>5. Healthcare-neurological health</b>                                                                                                               |                          |                          |                          |
| 16) I know whether or not a shunt is inserted due to my hydrocephalus.                                                                                 | <input type="checkbox"/> | <input type="checkbox"/> | <input type="checkbox"/> |
| 17) I Know the symptoms of shunt dysfunction (headache, vomiting, seizure, etc.).                                                                      | <input type="checkbox"/> | <input type="checkbox"/> | <input type="checkbox"/> |
| 18) I know the abnormal symptoms of the nervous system (numbness in the senses, weakness in the legs, changes in urine pattern, slurred speech, etc.). | <input type="checkbox"/> | <input type="checkbox"/> | <input type="checkbox"/> |
| <b>6. Healthcare-orthopedic health</b>                                                                                                                 |                          |                          |                          |
| 19) I know the names of assistive devices (braces, crutches, wheelchairs, etc.) used for mobility.                                                     | <input type="checkbox"/> | <input type="checkbox"/> | <input type="checkbox"/> |
| 20) I directly manage the assistive devices (orthosis, crutches, wheelchairs, etc.) used to move.                                                      | <input type="checkbox"/> | <input type="checkbox"/> | <input type="checkbox"/> |
| 21) I Know the skin abnormalities (redness, swelling, heat, blisters, pressure sores, etc.).                                                           | <input type="checkbox"/> | <input type="checkbox"/> | <input type="checkbox"/> |

| Transition items (cont'd)                                                                                                                  | Yes                      | No                       | N/A                      |
|--------------------------------------------------------------------------------------------------------------------------------------------|--------------------------|--------------------------|--------------------------|
| 6. Healthcare-orthopedic health (cont'd)                                                                                                   |                          |                          |                          |
| 22) I Knows how to prevent skin abnormalities (check the feet, etc.).                                                                      | <input type="checkbox"/> | <input type="checkbox"/> | <input type="checkbox"/> |
| 7. healthcare-sexual health                                                                                                                |                          |                          |                          |
| 23) I Knows about general sex education (secondary sexual characteristics, pregnancy, contraception, sexually transmitted diseases, etc.). | <input type="checkbox"/> | <input type="checkbox"/> | <input type="checkbox"/> |
| 24) I know the content of sex education related to spina bifida (sex life problems related to spina bifida, folic acid intake, etc.).      | <input type="checkbox"/> | <input type="checkbox"/> | <input type="checkbox"/> |
| 25) I Feel free to discuss with healthcare providers about sexual or pregnancy-related issues.                                             | <input type="checkbox"/> | <input type="checkbox"/> | <input type="checkbox"/> |
| 26) I Feel free to talk with my parents about sexual or pregnancy-related issues.                                                          | <input type="checkbox"/> | <input type="checkbox"/> | <input type="checkbox"/> |
| 8. Medical treatment-related issues                                                                                                        |                          |                          |                          |
| 27) I know the health insurance reinforcing policy (system)                                                                                | <input type="checkbox"/> | <input type="checkbox"/> | <input type="checkbox"/> |
| 28) I know how to issue medical records (medical reports, etc.).                                                                           | <input type="checkbox"/> | <input type="checkbox"/> | <input type="checkbox"/> |
| 29) I make an appointment for hospital treatment and examination without help.                                                             | <input type="checkbox"/> | <input type="checkbox"/> | <input type="checkbox"/> |
| 30) I record or know my treatment and examination schedule.                                                                                | <input type="checkbox"/> | <input type="checkbox"/> | <input type="checkbox"/> |
| 31) I prepare questions to be asked during treatment in advance.                                                                           | <input type="checkbox"/> | <input type="checkbox"/> | <input type="checkbox"/> |
| 32) I visit the hospital without help (using public transportation, walking, etc.).                                                        | <input type="checkbox"/> | <input type="checkbox"/> | <input type="checkbox"/> |
| 33) I do reception and receipt for hospital treatment and examination without help.                                                        | <input type="checkbox"/> | <input type="checkbox"/> | <input type="checkbox"/> |
| 34) I get hospital care and examinations without help.                                                                                     | <input type="checkbox"/> | <input type="checkbox"/> | <input type="checkbox"/> |
| 35) I ask questions during treatment.                                                                                                      | <input type="checkbox"/> | <input type="checkbox"/> | <input type="checkbox"/> |
| 9. Daily and school life                                                                                                                   |                          |                          |                          |
| 36) I manage my schedule (school and academy schedules, appointments with friends, leisure activities, etc.) without help.                 | <input type="checkbox"/> | <input type="checkbox"/> | <input type="checkbox"/> |
| 37) I express my thoughts and feelings.                                                                                                    | <input type="checkbox"/> | <input type="checkbox"/> | <input type="checkbox"/> |
| 38) I help prepare meals or do it myself.                                                                                                  | <input type="checkbox"/> | <input type="checkbox"/> | <input type="checkbox"/> |
| 39) I buy necessary items without help.                                                                                                    | <input type="checkbox"/> | <input type="checkbox"/> | <input type="checkbox"/> |
| 40) I use public transportation without help.                                                                                              | <input type="checkbox"/> | <input type="checkbox"/> | <input type="checkbox"/> |
| 41) I receive pocket money and manage the money myself.                                                                                    | <input type="checkbox"/> | <input type="checkbox"/> | <input type="checkbox"/> |
| 42) I explain my health condition to acquaintances or friends.                                                                             | <input type="checkbox"/> | <input type="checkbox"/> | <input type="checkbox"/> |
| 43) I participate in the Spinal Bifida Patients Association (Kakao Talk, SNS, meetings, etc.).                                             | <input type="checkbox"/> | <input type="checkbox"/> | <input type="checkbox"/> |
| 10. Preparing for the future                                                                                                               |                          |                          |                          |
| 44) I have a dream job for the future.                                                                                                     | <input type="checkbox"/> | <input type="checkbox"/> | <input type="checkbox"/> |
| 45) I have a plan to achieve my dream job.                                                                                                 | <input type="checkbox"/> | <input type="checkbox"/> | <input type="checkbox"/> |

| Transition items (cont'd)                                                                                                              |  | Yes                      | No                       | N/A                      |
|----------------------------------------------------------------------------------------------------------------------------------------|--|--------------------------|--------------------------|--------------------------|
| 10. Preparing for the future (cont'd)                                                                                                  |  |                          |                          |                          |
| 46) There is a person I consider to be a mentor.                                                                                       |  | <input type="checkbox"/> | <input type="checkbox"/> | <input type="checkbox"/> |
| 47) I know the university entrance examination related to spina bifida (equal opportunity admission- persons with special conditions). |  | <input type="checkbox"/> | <input type="checkbox"/> | <input type="checkbox"/> |
| 11. Family                                                                                                                             |  |                          |                          |                          |
| 48) My family allows me to do it myself.                                                                                               |  | <input type="checkbox"/> | <input type="checkbox"/> | <input type="checkbox"/> |
| 49) I share and discuss my future with my family.                                                                                      |  | <input type="checkbox"/> | <input type="checkbox"/> | <input type="checkbox"/> |
| 50) I discuss my health condition with my family.                                                                                      |  | <input type="checkbox"/> | <input type="checkbox"/> | <input type="checkbox"/> |
