# Supplementary material for: An Online-Based Transition Care Program for Adolescents with Spina Bifida Using Intervention Mapping: A Protocol for Program Development
Source: MDPI journal article supplement (doi:10.3390/ijerph19031056), 2022-01-18
Supplement: s1 [file s1]

# Individual Transition Plan (ITP)

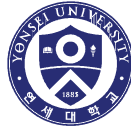

• Name: \_\_\_\_\_

• Diagnosis: \_\_\_\_\_

• Date of Birth: \_\_\_\_\_

• Mobile: \_\_\_\_\_

| Prioritized goals                                                                                                                     | Current Status / Plans | Actions | Target date | Complete data | Etc |
|---------------------------------------------------------------------------------------------------------------------------------------|------------------------|---------|-------------|---------------|-----|
| <b>[self goal]</b><br>• daily life<br><br>• voiding/bowel management<br><br>• healthcare system<br>(treatment, medicine, appointment) |                        |         |             |               |     |
|                                                                                                                                       |                        |         |             |               |     |
|                                                                                                                                       |                        |         |             |               |     |
| <b>[family goal]</b>                                                                                                                  |                        |         |             |               |     |
| <b>[other goal]</b>                                                                                                                   |                        |         |             |               |     |
| <b>[Memo]</b>                                                                                                                         |                        |         |             |               |     |

• Counsellor: \_\_\_\_\_

• Meeting date: 1st: \_\_\_\_\_

2nd: \_\_\_\_\_
