# Supplementary material for: An Online-Based Transition Care Program for Adolescents with Spina Bifida Using Intervention Mapping: A Protocol for Program Development
Source: MDPI journal article supplement (doi:10.3390/ijerph19031056), 2022-01-18
Supplement: s1 [file s1]

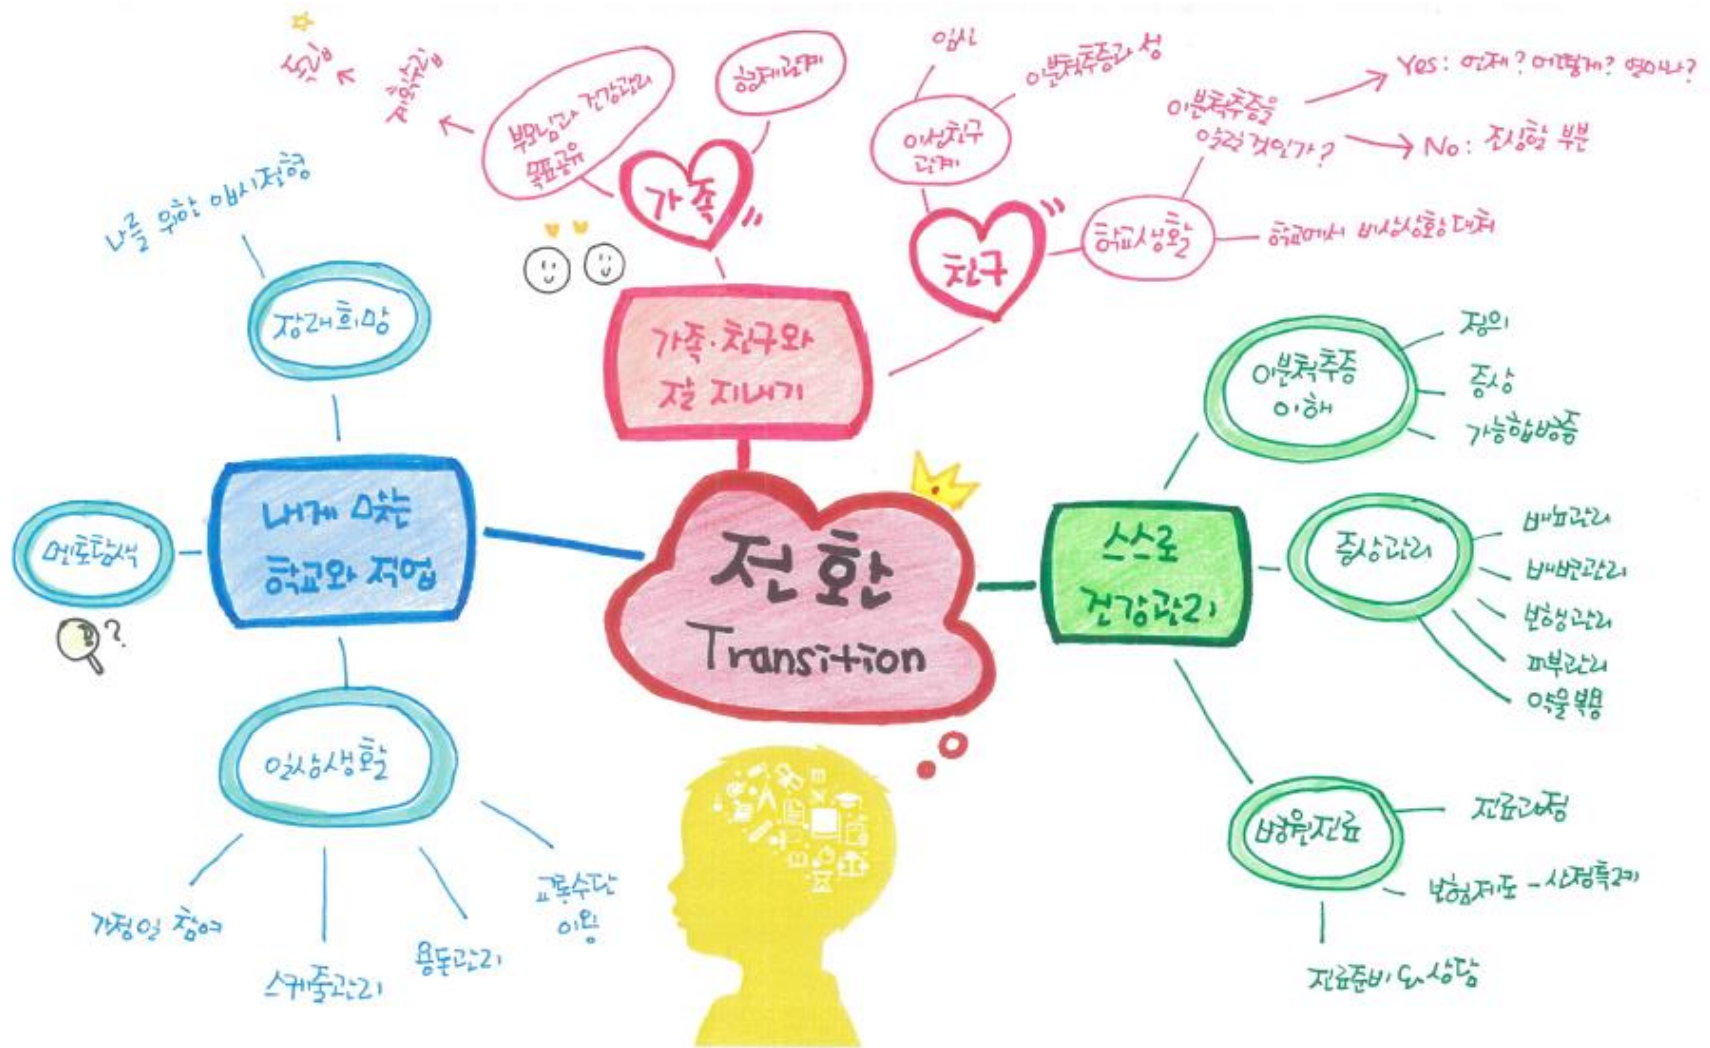

Mind map to express the goals of transition for adolescents with SB; Middle: transition; Left: finding the right school and jobs ; Right: taking care of their own health; Top: getting along well with family and friends.
